# Supplementary material
Source: MDPI journal article supplement (https://www.mdpi.com/2073-4441/12/12/3373)
Supplement: s1 [file s1 › water-960301-supplementary.pdf]

## 1. Equation used in the RclimDex

### CDD

It is the consuctive number of days with precipitation amount  $i$  for  $j$  period of time, where  $RR_{ij} < 1\text{mm}$

### CWD

It is the consuctive number of days with precipitation amount  $i$  for  $j$  period of time, where  $RR_{ij} > 1\text{mm}$

### PRCPOT

Let  $RR_{ij}$  is the daily precipitation amount  $i$  in  $j$  time period and  $I$  is the number of wet days during this time span, then

$PRCPOT_j =$

### 27. PRCPTOT

Let  $RR_{ij}$  be the daily precipitation amount on day  $i$  in period  $j$ . If  $I$  represents the number of days in  $j$ , then

$$PRCPOT = \sum_{i=1}^I RR_{ij}$$

### R10mm

Suppose the  $RR_{ij}$  is the precipitation amount on day  $I$  in a specific period  $j$ . Then it is the total number of days in specific period of time with precipitation amount  $RR_{ij} > 10\text{mm}$

### R20mm

Suppose the  $RR_{ij}$  is the precipitation amount on day  $I$  in a specific period  $j$ . Then it is the total number of days in specific period of time with precipitation amount  $RR_{ij} > 20\text{mm}$

### R25mm

Suppose the  $RR_{ij}$  is the precipitation amount on day  $I$  in a specific period  $j$ . Then it is the total number of days in specific period of time with precipitation amount  $RR_{ij} > 25\text{mm}$

### R95p

Suppose the  $RR_{ij}$  is the precipitation amount on wet day  $i$  ( $RR > 1\text{mm}$ ) in a specific period  $j$  and  $R95p$  is the 95<sup>th</sup> percentile of wet days during 1961-2014.

$$R95p = \sum_{i=1}^j RR_{ij} \text{ where } RR_{ij} > RR_{95^{\text{th}} \text{ percentile}}$$

### R99p

Suppose the  $RR_{ij}$  is the precipitation amount on wet day  $i$  ( $RR > 1\text{mm}$ ) in a specific period  $j$  and  $R95p$  is the 99<sup>th</sup> percentile of wet days during 1961-2014.

$$R95p = \sum_{i=1}^j RR_{ij} \text{ where } RR_{ij} > \text{RR 99th percentile}$$

### **RX1day**

Suppose the  $RR_{ij}$  is the precipitation amount on day  $i$  in a specific period  $j$ . Then it is the maximum precipitation amount in specific period of time  $Rx1day = \max(RR_{ij})$ .

### **RX5day**

Suppose the  $RR_{ij}$  is the precipitation amount for five day interval ending with  $i$  in a specific period  $j$ . Then it is the maximum value for precipitation amount in specific period of time  $Rx5day = \max(RR_{ij})$ .

### **SDII**

Suppose the  $RR_{ij}$  is the wet days precipitation amount ( $RR \geq 1\text{mm}$ ) in a specific period  $j$ . And if  $I$  represents the count of wet days in  $j$ , then

$$SDII_j = \frac{\sum_{i=1}^j RR_{ij}}{I}$$

## **2. Autocorrelation test**

The autocorrelation test has been employed to remove the correlation effects in the data. For the sample data  $(x_1, x_2, \dots, x_n)$  used in this study, the following steps were followed;

- i. Salas et al (1980) applied lag-1 serial coefficient on data to eliminate the effect of correlation from the data as presented in Equation (S1)

$$r_1 = \frac{\frac{1}{n-1} \sum_{i=1}^{n-1} (x_i - E(x_i))(x_{i+1} - E(x_{i+1}))}{\frac{1}{n} \sum_{i=1}^n (x_i - E(x_i))^2} \quad (S1)$$

$$E(x_i) = \frac{1}{n} \sum_{i=1}^n x_i \quad (S2)$$

Where the number of observation and mean of the data are represented by  $n$  and  $E(x_i)$ , respectively.

- ii. For testing the time series Equation (S3) was applied at the time series

$$\frac{-1 - 1.645\sqrt{(n-2)}}{n-1} \leq r_1 \leq \frac{-1 + 1.645\sqrt{(n-2)}}{n-1} \quad (S3)$$

For independent data sets the  $r_1$  value must be between the above mentioned intervals otherwise it is correlated if the value is not within the said intervals. The pre-whitening test must be applied to eliminate the effects of correlation as described below

$$(x_2 - r_1 x_1, x_3 - r_1 x_2, \dots, x_n - r_1 x_{n-1})$$

### 3. Mann-Kendall Trend Test

The most used non parametric approach for trend analysis named as Mann-Kendall trend test is used to analyse the time-series data in this study.

The 'S' statistic of the Mann-Kendall test can be obtained by applying the Equation (S4),

$$S = \sum_{i=1}^{n-1} \sum_{j=i+1}^n \text{sgn}(x_j - x_i) \quad (\text{S4})$$

where  $x_i$  and  $x_j$  are yearly values for  $i$  and  $j$  years, respectively, with  $j > i$ ,  $n$  represents the number of data points and  $\text{sgn}(x_j - x_i)$  is the sign function.

The variance of Mann Kendall can be computed as

$$V(S) = \frac{n(n-1)(2n+5) - \sum_{k=1}^m t_k(t_k-1)(2k+5)}{18} \quad (\text{S5})$$

where  $n$  represents the number of data points; whilst number of tied groups can be represented by  $m$  with the ties of extent  $k$ . A data group with the same values represents the tied group. The test statistics is computed using the below Equation (S6) for a sample size with  $n > 10$ .

$$Z_s = \begin{cases} \frac{s-1}{\sqrt{V(S)}} & \text{if } S > 0 \\ 0 & \text{if } S = 0 \\ \frac{s+1}{\sqrt{V(S)}} & \text{if } S < 0 \end{cases} \quad (\text{S6})$$

Positive/negative values of  $Z_s$  represents the increasing/decreasing trend. The null hypothesis ( $H_0$ ) is rejected if  $Z_s > Z_{1-\alpha/2}$ , where the values of  $Z_{1-\alpha/2}$  is achieved from a standard normal cumulative distribution table. The presented MK test is generally used to identify the significance of the data at 99.99% and/or 99% confidence interval of time series data for  $|Z_s| > 2.57$  and  $|Z_s| > 1.96$ , respectively, with the  $H_0$  of no trend is rejected.

### 4. Theil-Sen approach (TSA)

Sen (1968) presented the non-parametric approach to estimate the trends slope for  $N$  pairs of the data samples. Equally distributed time series should be arranged in ascending order and the below given formula applied to compute the trend slope.

$$Q_k = \frac{(x_j - x_i)}{j - i}, \text{ for } k=1, \dots, N \quad (\text{S7})$$

where  $x_i$  and  $x_j$  are data points of time series  $i$  and  $j$ , respectively, with  $(j > i)$ . The  $N = \frac{n(n-1)}{2}$  values of  $Q$  slopes are computed if there are  $n$  values of  $x_i$  are presents in the time series. All  $N$  values are arranged in ascending order to obtain the Sen's slope estimator, that is the median of these  $N$  values, with the help of Equation (S8)

$$Q_{med} = \begin{cases} Q_{(N+1)/2} & \text{if } N \text{ is odd} \\ \frac{Q_{N/2} + Q_{N/2+1}}{2} & \text{if } N \text{ is even} \end{cases} \quad (\text{S8})$$

The steepness of the slope is obtained from the magnitude of  $Q_{med}$  while its positive/negative sign represents the direction of increasing / decreasing trend.
